# Supplementary material for: Fe3O4 nanoparticle-integrated graphene sheets for high-performance half and full lithium ion cells
Source: Royal Society of Chemistry journal article supplement (doi:10.1039/c1cp20455f), 2011-01-01
Supplement: c1cp20455f.pdf [file c1cp20455f.pdf]

## **Supporting Information for**

### **Fe<sub>3</sub>O<sub>4</sub> nanoparticles integrated graphene sheets for high-performance half and full lithium-ion cells**

Liwen Ji<sup>†</sup>, Zhongkui Tan<sup>†</sup>, Tevye R. Kuykendall<sup>†</sup>, Shaul Aloni<sup>†</sup>, Shidi Xun<sup>‡</sup>, Eric Lin<sup>†</sup>, Vincent Battaglia<sup>‡</sup>, and Yuegang Zhang<sup>†\*</sup>

<sup>†</sup>The Molecular Foundry, Lawrence Berkeley National Laboratory, 1 Cyclotron Road, Berkeley, California 94720 and <sup>‡</sup>Advanced Energy Technology Department, Lawrence Berkeley National Laboratory, Berkeley, California 94720, USA.

\* Address correspondence to yzhang5@lbl.gov.

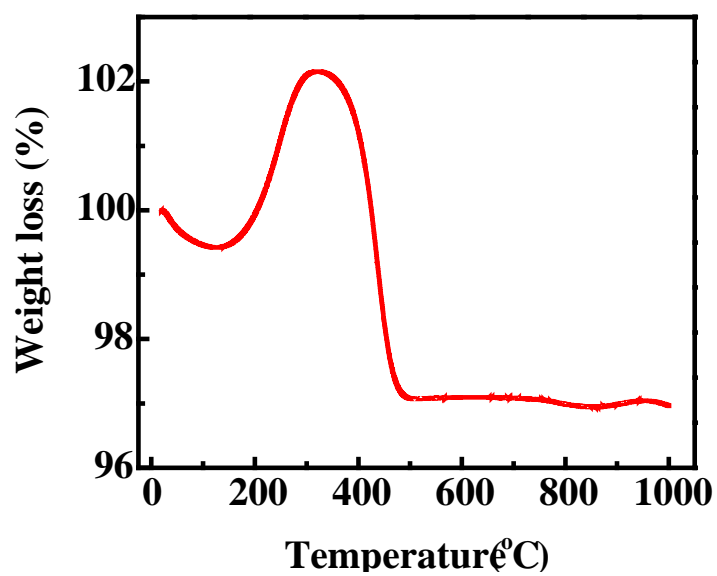

**Figure S1.** Thermogravimetric result of RGO-Fe<sub>3</sub>O<sub>4</sub> nanocomposite oxidation in air environment with a heating rate of 10 °C/min.

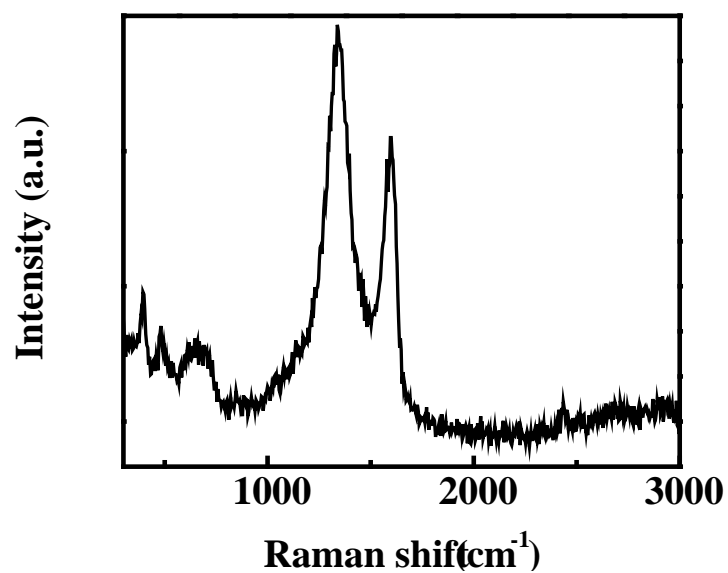

**Figure S2.** Raman spectroscopy of the as-prepared RGO-Fe<sub>3</sub>O<sub>4</sub> nanocomposites.

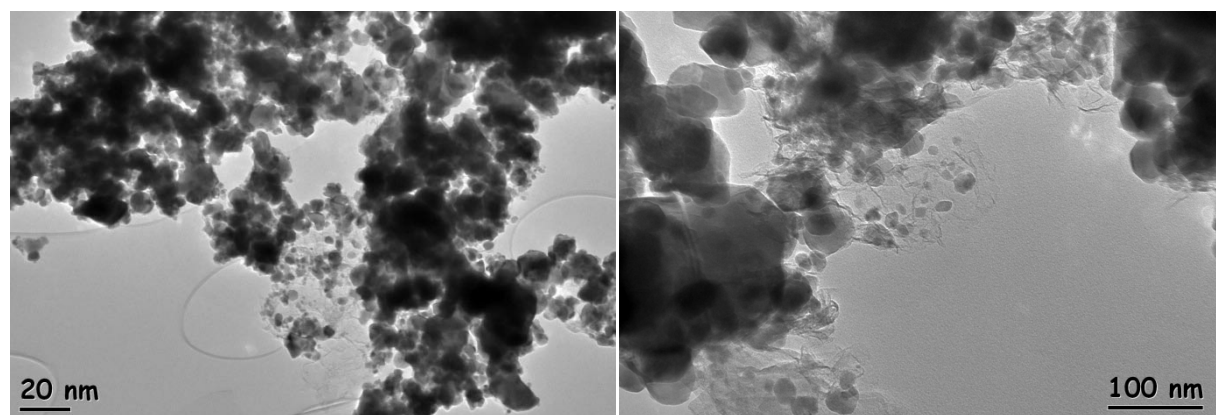

Figure S3. TEM images of the as-synthesized RGO-Fe<sub>3</sub>O<sub>4</sub> nanocomposites.

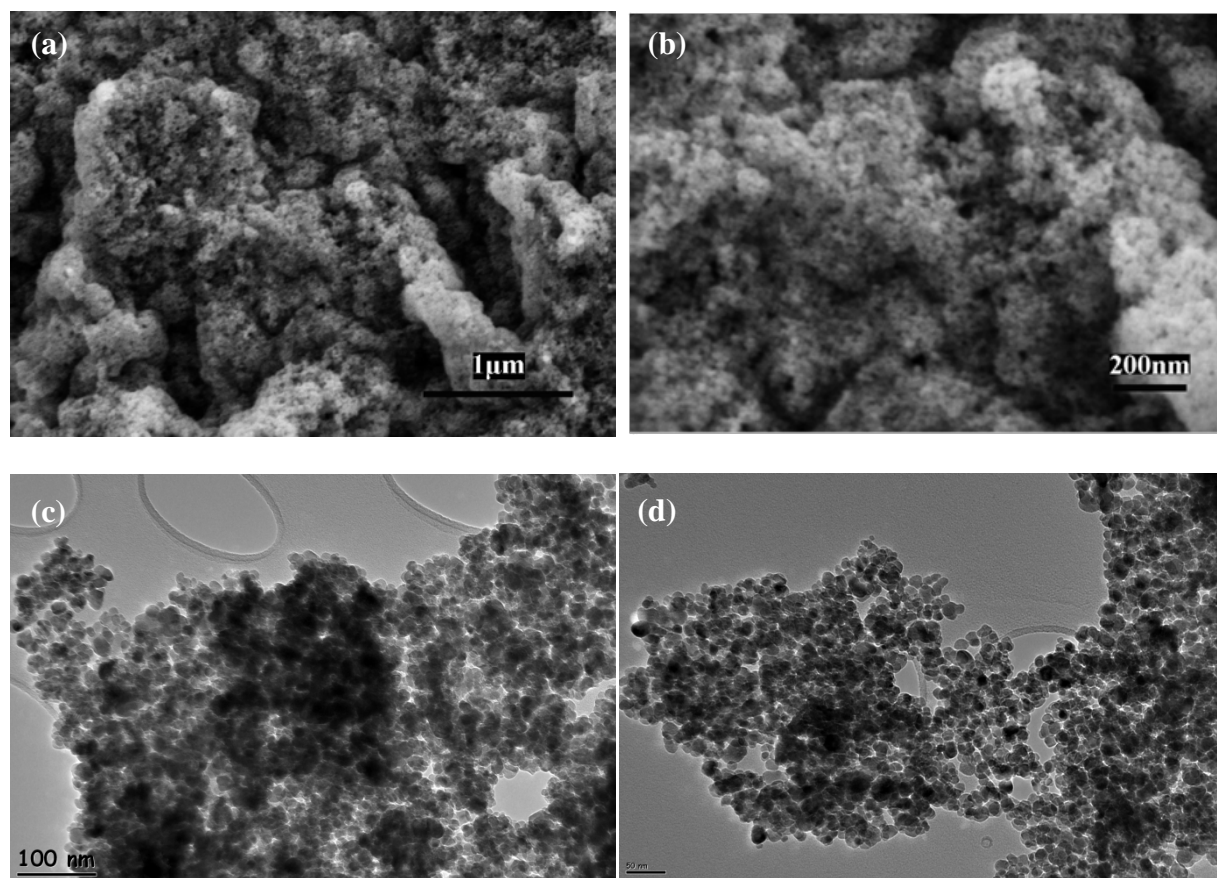

Figure S4. SEM (a,b), and TEM images (c,d) of pure  $\text{Fe}_3\text{O}_4$  nanoparticles.

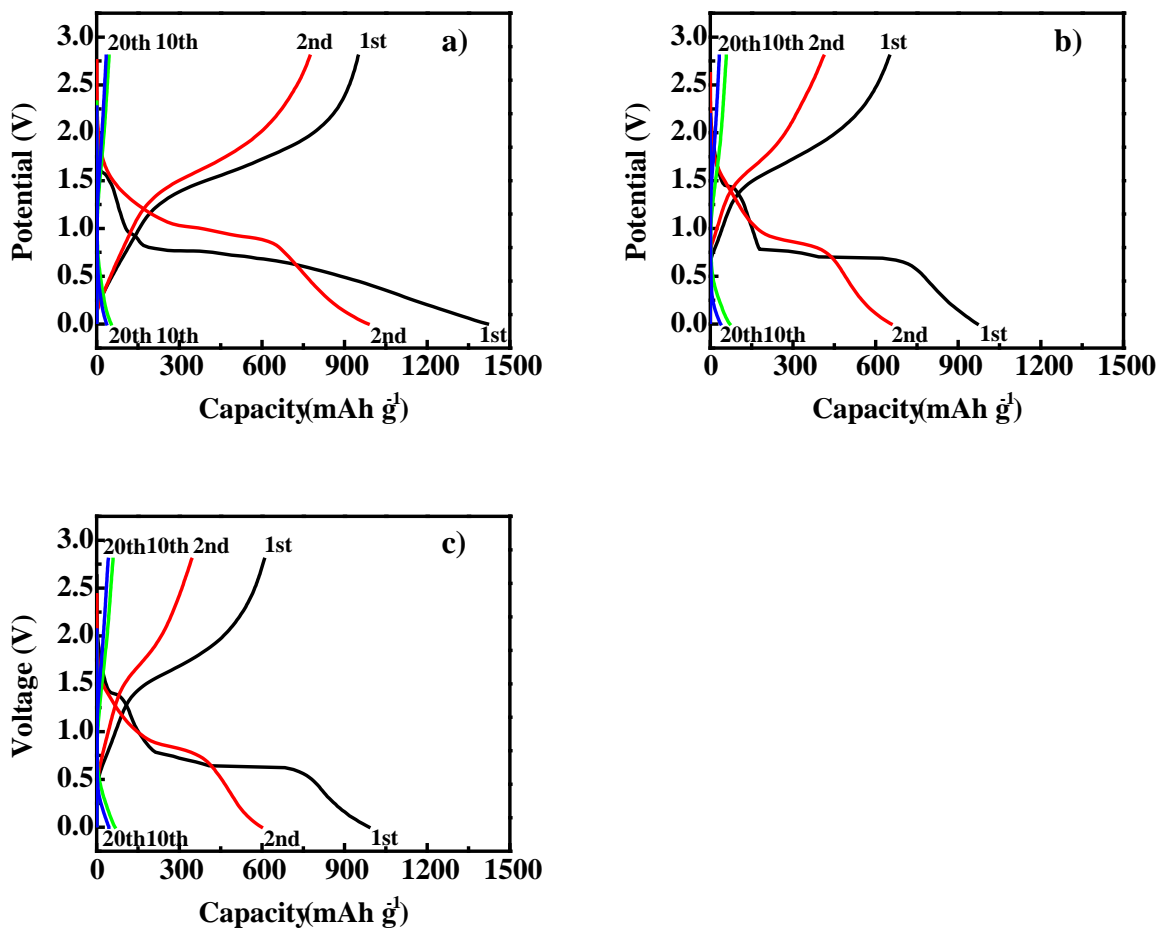

**Figure S5.** Galvanostatic charge/discharge profiles of pure  $\text{Fe}_3\text{O}_4$  nanoparticles at different cycling rate of (a) 0.2C, (b) 0.5C, (c) 1C, with a cutoff voltage window of 2.8 V to 0.002 V.
